# Supplementary material for: Bactericidal Effect of Underwater Plasma Treatment on Waste Brine from Kimchi Production Process and the Evaluation of Reusability of Plasma-Treated Waste Brine in Salting Kimchi Cabbage
Source: MDPI journal article supplement (doi:10.3390/foods12040728), 2023-02-07
Supplement: s1 [file s1]

## Appendix A1. Supplementary material

**Table S1.** 16s rRNA gene sequencing from microorganisms isolated from waste brine

| No.  | Description                                                                                  | Identities (%) |
|------|----------------------------------------------------------------------------------------------|----------------|
| PCA1 | <i>Bacillus stratosphericus</i> strain IHB B 6832 16S rRNA gene, partial sequence            | 99             |
|      | <i>Bacillus altitudinis</i> strain IHB B 1045 16S rRNA gene, partial sequence                | 99             |
|      | <i>Bacillus aerophilus</i> strain IHB B 15224 16S rRNA gene, partial sequence                | 99             |
|      | Uncultured bacterium clone Y27 16S rRNA gene, partial sequence                               | 97             |
| PCA2 | <i>Paenibacillus</i> sp. O-4c gene for 16S rRNA, partial sequence                            | 97             |
|      | Uncultured organism clone ELU0035-T194-S-N1 000090 small subunit rRNA gene, partial sequence | 98             |
|      | <i>Microbacterium testaceum</i> StLB037 DNA, complete genome                                 | 99             |
| PCA3 | <i>Microbacterium testaceum</i> StLB037 16S rRNA, complete sequence                          | 99             |
|      | <i>Microbacterium testaceum</i> strain V12 16S rRNA gene, partial sequence                   | 99             |
|      | <i>Curtobacterium oceanosedimentum</i> partial 16S rRNA gene, strain L24                     | 99             |
| PCA4 | <i>Curtobacterium oceanosedimentum</i> strain JN24 16S rRNA gene, partial sequence           | 99             |
|      | <i>Bacillus subtilis</i> strain TPL16 16S rRNA gene, partial sequence                        | 99             |
|      | <i>Kocuria palustris</i> strain M16_2A 16S ribosomal RNA gene, partial sequence              | 99             |
| PCA5 | <i>Kocuria</i> sp. BBB3 16S rRNA gene, partial sequence                                      | 99             |
|      | <i>Kocuria palustris</i> strain MU14/1, complete genome                                      | 99             |
|      | <i>Kocuria palustris</i> strain IHBB 11063 16S rRNA gene, partial sequence                   | 99             |
| PCA6 | <i>Kocuria palustris</i> strain MU14/1, complete genome                                      | 100            |
|      | <i>Kocuria palustris</i> strain 3538 16S rRNA gene, partial sequence                         | 100            |
|      | <i>Psychrobacter piscatorii</i> gene for 16S rRNA, partial sequence                          | 99             |
| PCA7 | <i>Psychrobacter piscatorii</i> strain T-3-2 16S rRNA gene, partial sequence                 | 100            |
|      | <i>Gamma proteobacterium</i> UMB21A 16S rRNA gene, partial sequence                          | 99             |
| PCA8 | <i>Microbacteriaceae</i> bacterium SAP771.4 16S rRNA gene, partial sequence                  | 99             |

|       |                                                                                                                                                                                                           |     |
|-------|-----------------------------------------------------------------------------------------------------------------------------------------------------------------------------------------------------------|-----|
|       | <i>Herbiconiux</i> sp. I10A-02292 16S rRNA gene, partial sequence                                                                                                                                         | 99  |
|       | Uncultured bacterium clone QQSB17 16S rRNA gene, partial sequence                                                                                                                                         | 99  |
|       | <i>Microbacterium testaceum</i> strain 343 16S rRNA gene, partial sequence                                                                                                                                | 99  |
| PCA9  | <i>Microbacterium testaceum</i> strain LM-2 16S rRNA gene, partial sequence                                                                                                                               | 99  |
|       | <i>Microbacterium testaceum</i> partial 16S rRNA gene, strain YJM-08                                                                                                                                      | 99  |
|       | <i>Microbacterium testaceum</i> strain V12 16S rRNA gene, partial sequence                                                                                                                                | 99  |
| PCA10 | <i>Microbacterium testaceum</i> StLB037 DNA, complete genome                                                                                                                                              | 99  |
|       | <i>Microbacterium testaceum</i> StLB037 strain StLB037 16S rRNA, complete sequence                                                                                                                        | 99  |
|       | <i>Microbacterium oxydans</i> strain IHB B13601 16S rRNA gene, partial sequence                                                                                                                           | 99  |
| PCA11 | Uncultured bacterium clone NDB8 16S rRNA gene, partial sequence                                                                                                                                           | 99  |
|       | Uncultured bacterium gene for 16S rRNA, partial sequence, clone: SC35                                                                                                                                     | 99  |
|       | Bacterium YC-ZSS-LKJ71 16S rRNA gene, partial sequence                                                                                                                                                    | 99  |
| PCA12 | <i>Marinilactibacillus psychrotolerans</i> gene for 16S rRNA                                                                                                                                              | 99  |
|       | <i>Marinilactibacillus psychrotolerans</i> gene for 16S rRNA, partial sequence, strain: NBRC 100008                                                                                                       | 99  |
|       | <i>Sphingomonas phyllosphaerae</i> strain FA2 16S rRNA gene, partial sequence                                                                                                                             | 99  |
| PCA13 | <i>Sphingomonas phyllosphaerae</i> strain FA1 16S rRNA gene, partial sequence                                                                                                                             | 99  |
|       | <i>Sphingomonas phyllosphaerae</i> 16S rRNA gene, complete sequence                                                                                                                                       | 99  |
|       | Bacterium YC-ZSS-LKJ71 16S rRNA gene, partial sequence                                                                                                                                                    | 99  |
| PCA14 | <i>Marinilactibacillus psychrotolerans</i> gene for 16S rRNA                                                                                                                                              | 99  |
|       | <i>Marinilactibacillus psychrotolerans</i> gene for 16S rRNA, partial sequence, strain: M13-5                                                                                                             | 100 |
|       | <i>Hypocreales</i> sp. HWJ2(1) 18S rRNA gene, partial sequence; internal transcribed spacer 1, 5.8S rRNA gene, and internal transcribed spacer 2, complete sequence; and 28S rRNA gene, partial sequence  | 99  |
| PCA15 | <i>Hypocreales</i> sp. BAB-3884 18S rRNA gene, partial sequence; internal transcribed spacer 1, 5.8S rRNA gene, and internal transcribed spacer 2, complete sequence; and 28S rRNA gene, partial sequence | 99  |

|       |                                                                                                                                                                                                          |     |
|-------|----------------------------------------------------------------------------------------------------------------------------------------------------------------------------------------------------------|-----|
|       | Uncultured fungus clone CMH100 18S rRNA gene, partial sequence; internal transcribed spacer 1, 5.8S rRNA gene, and internal transcribed spacer 2, complete sequence; and 28S rRNA gene, partial sequence | 99  |
|       | <i>Sanguibacter inulinus</i> strain ST50 16S rRNA gene, partial sequence                                                                                                                                 | 99  |
| PCA16 | <i>Sanguibacter</i> sp. Everest-gws-55 16S rRNA gene, partial sequence                                                                                                                                   | 99  |
|       | <i>Sanguibacter suarezii</i> ST50 16S rDNA                                                                                                                                                               | 99  |
|       | <i>Bacillus</i> sp. 6061 16S rRNA gene, partial sequence                                                                                                                                                 | 99  |
| PCA17 | <i>Bacillus</i> sp. A5-11 16S rRNA gene, parital sequence                                                                                                                                                | 99  |
|       | <i>Brevundimonas bullata</i> strain IHBB 9337 16S rRNA gene, parital sequence                                                                                                                            | 99  |
|       | Uncultured bacterium clone YT-53 16S rRNA gene, partial sequence                                                                                                                                         | 100 |
| PCA18 | <i>Methylobacterium radiotolerans</i> gene for 16S rRNA, partial sequence, strain: 91a                                                                                                                   | 100 |
|       | <i>Methylobacterium</i> sp. 13635G 16S rRNA gene, parital sequence                                                                                                                                       | 100 |
|       | <i>Arthrobacter oxydans</i> strain IHBB 11072 16S rRNA gene, partial sequence                                                                                                                            | 99  |
| PCA19 | <i>Arthrobacter oxydans</i> strain 32 16S rRNA gene, parital sequence                                                                                                                                    | 99  |
|       | Uncultured bacterium clone EMIRGE_OUT_sl2b_203 16S rRNA gene, partial sequence                                                                                                                           | 99  |
|       | <i>Bacillus</i> sp. A-3-15 16S rRNA gene, partial sequence                                                                                                                                               | 100 |
| PCA20 | <i>Bacillus subtilis</i> strain H-3 16S rRNA gene, partial sequence                                                                                                                                      | 99  |
|       | <i>Bacillus megaterium</i> strain Q3, complete genome                                                                                                                                                    | 99  |
|       | <i>Paenibacillus</i> strain DCY03 16S rRNA gene, partial sequence                                                                                                                                        | 96  |
| PCA21 | <i>Paenibacillus</i> sp. NBRC 13579 gene for 16S rRNA, partial sequence                                                                                                                                  | 96  |
|       | <i>Paenibacillus chinjuensis</i> strain WN9 16S rRNA gene, partial sequence                                                                                                                              | 96  |
|       | <i>Bacillus megaterium</i> strain J-65 16S rRNA gene, partial sequence                                                                                                                                   | 99  |
| PCA22 | <i>Bacillus subtilis</i> strain H-3 16S rRNA gene, partial sequence                                                                                                                                      | 99  |
|       | <i>Bacillus megaterium</i> strain Q3, complete genome                                                                                                                                                    | 99  |
|       | <i>Bacillus megaterium</i> strain J-65 16S rRNA gene, partial sequence                                                                                                                                   | 100 |
| PCA23 | <i>Bacillus</i> sp. No.44 gene for 16S rRNA, partial sequence                                                                                                                                            | 99  |
|       | <i>Bacillus</i> sp. A-3-15 16S rRNA gene, partial sequence                                                                                                                                               | 100 |
|       | Bacterium YC-ZSS-LKJ71 16S rRNA gene, partial sequence                                                                                                                                                   | 99  |
| PCA24 | <i>Marinilactibacillus psychrotolerans</i> gene for 16S rRNA                                                                                                                                             | 99  |

|      |                                                                                                                                    |     |
|------|------------------------------------------------------------------------------------------------------------------------------------|-----|
|      | <i>Marinilactibacillus psychrotolerans</i> gene for 16S rRNA, partial sequence for 16S rRNA, partial sequence, strain: NBRC 100008 | 99  |
|      | Uncultured marine bacterium clone Tc-111 16S rRNA gene, partial sequence                                                           | 100 |
| TSA1 | <i>Methylobacterium fujisawaense</i> strain S13 16S rRNA gene, partial sequence                                                    | 100 |
|      | <i>Methylobacterium fujisawaense</i> gene for 16S rRNA, partial sequence                                                           | 100 |
|      | <i>Sanguibacter keddieii</i> DSM 10542, complete genome                                                                            | 99  |
| TSA2 | <i>Sanguibacter keddieii</i> strain DSM 10542 16S rRNA gene, partial sequence                                                      | 99  |
|      | <i>Sanguibacter keddieii</i> strain DSM 10542 16S rRNA gene, complete sequence                                                     | 99  |
|      | <i>Paenibacillus lactis</i> strain VV03 16S rRNA gene, partial sequence                                                            | 99  |
| TSA3 | <i>Paenibacillus lactis</i> strain LG2 16S rRNA gene, partial sequence                                                             | 99  |
|      | <i>Paenibacillus lactis</i> strain SCTB114 16S rRNA gene, partial sequence                                                         | 99  |
|      | Uncultured bacterium clone 286 16S rRNA gene, partial sequence                                                                     | 99  |
| TSA4 | Uncultured bacterium clone 411 16S rRNA gene, partial sequence                                                                     | 99  |
|      | <i>Microbacterium</i> sp. N3 16S rRNA gene, partial sequence                                                                       | 99  |
|      | <i>Kocuria palustris</i> strain MU14/1, complete genome                                                                            | 100 |
| TSA5 | <i>Kocuria palustris</i> strain 3538 16S rRNA gene, partial sequence                                                               | 100 |
|      | <i>Kocuria palustris</i> strain 3474 16S rRNA gene, partial sequence                                                               | 100 |
|      | <i>Staphylococcus capitis</i> CR01 complete genome                                                                                 | 99  |
| TSA6 | <i>Staphylococcus capitis</i> subsp. <i>capitis</i> strain AYP1020, complete genome                                                | 99  |
|      | <i>Staphylococcus caprae</i> partial 16S rRNA gene, strain S3                                                                      | 99  |
|      | <i>Bacillus circulans</i> strain X3 16S rRNA gene, partial sequence                                                                | 99  |
| TSA7 | <i>Bacillus circulans</i> strain G1-4-80 16S rRNA gene, partial sequence                                                           | 99  |
|      | <i>Bacillus circulans</i> strain IHB B 8016 16S rRNA gene, partial sequence                                                        | 99  |
|      | <i>Bacillus</i> sp. 60LGy-1 gene for 16S rRNA, partial sequence                                                                    | 99  |
| TSA8 | <i>Bacillus</i> sp. N-21 gene for 16S rRNA, partial sequence                                                                       | 99  |
|      | <i>Bacillus thermoamylovorans</i> partial 16S rRNA, strain R-7764                                                                  | 99  |
|      | <i>Psychrobacter piscatorii</i> gene for 16S rRNA, partial sequence                                                                | 99  |
| TSA9 | <i>Psychrobacter piscatorii</i> strain T-3-2 16S rRNA gene, partial sequence                                                       | 100 |

|       |                                                                                                     |     |
|-------|-----------------------------------------------------------------------------------------------------|-----|
|       | Gamma proteobacterium UMB21A 16S rRNA gene, partial sequence                                        | 99  |
|       | <i>Microbacterium testaceum</i> strain V12 16S rRNA gene, partial sequence                          | 99  |
| TSA10 | <i>Microbacterium testaceum</i> StLB037 DNA, complete genome                                        | 99  |
|       | <i>Microbacterium testaceum</i> StLB037 strain StLB037 16S rRNA, complete sequence                  | 99  |
|       | <i>Bacillus simplex</i> strain IHB B 17010 16S rRNA gene, partial sequence                          | 99  |
| TSA11 | <i>Bacillus simplex</i> strain IHB B 15619 16S rRNA gene, partial sequence                          | 99  |
|       | <i>Bacillus simplex</i> strain IHB B 7001 16S rRNA gene, partial sequence                           | 99  |
|       | Uncultured bacterium clone f4h7 16S rRNA gene, partial sequence                                     | 99  |
| TSA12 | Uncultured bacterium clone s2h10a 16S rRNA gene, partial sequence                                   | 99  |
|       | Uncultured bacterium clone s1s17a 16S rRNA gene, partial sequence                                   | 100 |
|       | Bacterium YC-ZSS-LKJ71 16S rRNA gene, partial sequence                                              | 99  |
| TSA13 | <i>Marinilactibacillus psychrotolerans</i> gene for 16S rRNA                                        | 99  |
|       | <i>Marinilactibacillus psychrotolerans</i> gene for 16S rRNA, partial sequence, strain: NBRC 100008 | 99  |
|       | <i>Microbacterium trichothecenolyticum</i> strain E-5 16S rRNA gene, partial sequence               | 99  |
| TSA14 | Uncultured <i>Microbacterium</i> sp. clone AtlantisII_a 16S rRNA gene, partial sequence             | 99  |
|       | <i>Microbacterium trichothecenolyticum</i> strain E-1 16S rRNA gene, partial sequence               | 99  |
|       | <i>Bacillus infantis</i> 16S rRNA, complete sequence                                                | 99  |
| TSA15 | <i>Bacillus infantis</i> NRRL B-14911, complete genome                                              | 99  |
|       | <i>Bacillus</i> sp. CNJ905 PL04 16S rRNA gene, partial sequence                                     | 99  |
|       | <i>Bacillus</i> sp. S12206 16S rRNA gene, partial sequence                                          | 99  |
| TSA16 | <i>Bacillus simplex</i> strain N25 16S rRNA gene, partial sequence                                  | 99  |
|       | <i>Bacillus</i> sp. S11208 16S rRNA gene, partial sequence                                          | 99  |
| TSA17 | <i>Bacillus</i> sp. 6061 rRNA gene, partial sequence                                                | 99  |
|       | <i>Bacillus</i> sp. A5-11 16S rRNA gene, partial sequence                                           | 99  |

|       |                                                                                                     |     |
|-------|-----------------------------------------------------------------------------------------------------|-----|
|       | <i>Bacillus</i> sp. TP-Sbiw-C13 16S rRNA gene, partial sequence                                     | 99  |
|       | Bacterium YC-ZSS-LKJ71 16S rRNA gene, partial sequence                                              | 99  |
| TSA18 | <i>Marinilactibacillus psychrotolerans</i> gene for 16S rRNA                                        | 99  |
|       | <i>Marinilactibacillus psychrotolerans</i> gene for 16S rRNA, partial sequence, strain: NBRC 100008 | 99  |
|       | Uncultured bacterium clone RS-B13 16S rRNA gene, partial sequence                                   | 99  |
| TSA19 | Uncultured bacterium clone EDW07B001_137 16S rRNA gene, partial sequence                            | 99  |
|       | Uncultured bacterium clone EDW07B001_114 16S rRNA gene, partial sequence                            | 99  |
|       | <i>Psychrobacter piscatorii</i> gene for 16S rRNA, partial sequence                                 | 99  |
| TSA20 | <i>Psychrobacter piscatorii</i> strain T-3-2 16S rRNA gene, partial sequence                        | 99  |
|       | Gamma proteobacterium UMB21A 16S rRNA gene, partial sequence                                        | 99  |
|       | <i>Microbacterium trichotecenolyticum</i> strain 3370 16S rRNA gene, partial sequence               | 100 |
| TSA21 | <i>Microbacterium trichothecenolyticum</i> strain E-5 16S rRNA gene, partial sequence               | 99  |
|       | <i>Microbacterium trichotecenolyticum</i> strain 332 16S rRNA gene, partial sequence                | 100 |
|       | <i>Bacillus</i> sp. S22906 16S rRNA gene, partial sequence                                          | 99  |
| TSA22 | <i>Bacillus subterraneus</i> strain Lr10/2 16S rRNA gene, partial sequence                          | 99  |
|       | Uncultured bacterium clone S_e12 16S rRNA gene, partial sequence                                    | 99  |
|       | <i>Bacillus subtilis</i> strain H-3 16S rRNA gene, partial sequence                                 | 99  |
| TSA23 | <i>Bacillus megaterium</i> strain Q3, complete genome                                               | 99  |
|       | <i>Bacillus megaterium</i> gene for 16S rRNA, partial sequence, strain: Beb-46                      | 99  |
|       | <i>Marinilactibacillus psychrotolerans</i> gene for 16S rRNA                                        | 99  |
| TSA24 | Bacterium YC-ZSS-LKJ71 16S rRNA gene, partial sequence                                              | 99  |
|       | <i>Marinilactibacillus psychrotolerans</i> gene for 16S rRNA, partial sequence, strain: NBRC 100008 | 99  |

|       |                                                                                                                                                                                                           |     |
|-------|-----------------------------------------------------------------------------------------------------------------------------------------------------------------------------------------------------------|-----|
|       | <i>Marinilactibacillus psychrotolerans</i> gene for 16S rRNA, partial sequence, strain: NBRC 100008                                                                                                       | 99  |
| TSA25 | <i>Marinilactibacillus psychrotolerans</i> gene for 16S rRNA                                                                                                                                              | 99  |
|       | <i>Marinilactibacillus psychrotolerans</i> strain NBRC 100002 16S rRNA gene, partial sequence                                                                                                             | 99  |
|       | Uncultured bacterium clone L3-B74 small subunit ribosomal RNA gene, partial sequence                                                                                                                      | 99  |
| MA1   | <i>Psychrobacter piscatorii</i> gene for 16S rRNA, partial sequence                                                                                                                                       | 99  |
|       | <i>Psychrobacter piscatorii</i> strain T-3-2 16S rRNA gene, partial sequence                                                                                                                              | 100 |
|       | <i>Bacillus</i> sp. 18PAM3 16S rRNA gene, partial sequence                                                                                                                                                | 99  |
| MA2   | <i>Bacillus licheniformis</i> strain LZLJ005 16S rRNA gene, partial sequence                                                                                                                              | 99  |
|       | <i>Bacillus licheniformis</i> strain CCMMB918 16S rRNA gene, partial sequence                                                                                                                             | 99  |
|       | Uncultured <i>Bacillus</i> sp. Clone ACH-14S-203 16S rRNA gene, partial sequence                                                                                                                          | 99  |
| MA3   | <i>Bacillus</i> sp. C-3-8 16S rRNA gene, partial sequence                                                                                                                                                 | 99  |
|       | <i>Bacillus</i> sp. A-3-21 16S rRNA gene, partial sequence                                                                                                                                                | 99  |
|       | <i>Hypocreales</i> sp. BAB-2884 18S rRNA gene, partial sequence; internal transcribed spacer 1, 5.8S rRNA gene, and internal transcribed spacer 2, complete sequence; and 28S rRNA gene, partial sequence | 99  |
|       | <i>Hypocreales</i> sp. HWJ2(1) 18S rRNA gene, partial sequence; internal transcribed spacer 1, 5.8S rRNA gene, and internal transcribed spacer 2, complete sequence; and 28S rRNA gene, partial sequence  | 99  |
| MA4   | Uncultured fungus clone CMH100 18S rRNA gene, partial sequence; internal transcribed spacer 1, 5.8S rRNA gene, and internal transcribed spacer 2, complete sequence; and 28S rRNA gene, partial sequence  | 99  |
|       | <i>Bacillus</i> sp. Mixed culture X3-41 16S rRNA gene, partial sequence                                                                                                                                   | 98  |
| MA5   | <i>Bacillus oceanisediminis</i> gene for 16S rRNA, partial sequence                                                                                                                                       | 98  |
|       | <i>Bacillus circulans</i> strain 5S5 16S rRNA gene, partial sequence                                                                                                                                      | 98  |
|       | <i>Psychrobacter piscatorii</i> gene for 16S rRNA, partial sequence                                                                                                                                       | 99  |
| MA6   | <i>Psychrobacter piscatorii</i> strain T-3-2 16S rRNA gene, partial sequence                                                                                                                              | 100 |

|      |                                                                                                                                                                                                                                    |     |
|------|------------------------------------------------------------------------------------------------------------------------------------------------------------------------------------------------------------------------------------|-----|
|      | Gamma proteobacterium UMB21A 16S rRNA gene, partial sequence                                                                                                                                                                       | 99  |
|      | <i>Psychrobacter piscatorii</i> gene for 16S rRNA, partial sequence                                                                                                                                                                | 99  |
| MA7  | <i>Psychrobacter piscatorii</i> strain T-3-2 16S rRNA gene, partial sequence                                                                                                                                                       | 100 |
|      | Gamma proteobacterium UMB21A 16S rRNA gene, partial sequence                                                                                                                                                                       | 99  |
|      | <i>Plantibacter</i> sp. NJ-81 16S rRNA gene, strain NJ-81                                                                                                                                                                          | 100 |
| MA8  | <i>Plantibacter</i> sp. S51 partial 16S rRNA gene, strain S51                                                                                                                                                                      | 99  |
|      | Uncultured <i>Plantibacter</i> sp. Gene for 16S rRNA, partial sequence, clone:1X72                                                                                                                                                 | 99  |
|      | <i>Psychrobacter piscatorii</i> gene for 16S rRNA, partial sequence                                                                                                                                                                | 99  |
| MA9  | <i>Psychrobacter piscatorii</i> strain T-3-2 16S rRNA gene, partial sequence                                                                                                                                                       | 99  |
|      | Gamma proteobacterium UMB21A 16S rRNA gene, partial sequence                                                                                                                                                                       | 99  |
|      | <i>Microbacterium testaceum</i> strain LM-2 16S rRNA gene, partial sequence                                                                                                                                                        | 99  |
| MA10 | <i>Microbacterium testaceum</i> partial 16S rRNA gene, strain YJM-08                                                                                                                                                               | 99  |
|      | <i>Microbacterium</i> sp. Acj 118 gene for 16S rRNA, partial sequence                                                                                                                                                              | 99  |
|      | <i>Plectosphaerella cucumerina</i> isolate Ecu215 18S rRNA gene, partial sequence;<br>internal transcribed spacer 1, 5.8S rRNA gene, and internal transcribed spacer<br>2, complete sequence; and 28S rRNA gene, partial sequence  | 99  |
|      | <i>Plectosphaerella cucumerina</i> isolate Ecu212a 18S rRNA gene, partial sequence;<br>internal transcribed spacer 1, 5.8S rRNA gene, and internal transcribed spacer<br>2, complete sequence; and 28S rRNA gene, partial sequence | 99  |
| MA11 | <i>Trichurus spiralis</i> strain HSAUP052611 18S rRNA gene, partial sequence;<br>internal transcribed spacer 1, 5.8S rRNA gene, and internal transcribed spacer<br>2, complete sequence; and 28S rRNA gene, partial sequence       | 99  |
|      | <i>Psychrobacter piscatorii</i> gene for 16S rRNA, partial sequence                                                                                                                                                                | 99  |
| MA12 | <i>Psychrobacter piscatorii</i> strain T-3-2 16S rRNA gene, partial sequence                                                                                                                                                       | 100 |
|      | Gamma proteobacterium UMB21A 16S rRNA gene, partial sequence                                                                                                                                                                       | 99  |
|      | <i>Microbacterium testaceum</i> strain LM-2 16S rRNA gene, partial sequence                                                                                                                                                        | 99  |
| MA13 | <i>Microbacterium</i> sp. Acj 118 gene for 16S rRNA, partial sequence                                                                                                                                                              | 99  |
|      | <i>Microbacterium testaceum</i> strain 343 16S rRNA gene, partial sequence                                                                                                                                                         | 99  |



|      |                                                                                     |     |
|------|-------------------------------------------------------------------------------------|-----|
|      | <i>Kocuria palustris</i> strain MU14/1, complete genome                             | 100 |
| MA14 | <i>Kocuria palustris</i> strain IHBB 11063 16S rRNA gene, partial sequence          | 100 |
|      | <i>Kocuria palustris</i> strain 3538 16S rRNA gene, partial sequence                | 100 |
|      | <i>Bacillus</i> sp. EC2 16S rRNA gene, partial sequence                             | 99  |
| MA15 | <i>Bacillus</i> sp. IARI-HHS2-45 16S rRNA gene, partial sequence                    | 99  |
|      | <i>Bacillus</i> sp. 3549BRRJ 16S rRNA gene, partial sequence                        | 99  |
|      | <i>Bacillus simplex</i> strain IHB B 17010 16S rRNA gene, partial sequence          | 99  |
| MA16 | <i>Bacillus</i> sp. S12206 16S rRNA gene, partial sequence                          | 99  |
|      | <i>Bacillus</i> sp. S11208 16S rRNA gene, partial sequence                          | 99  |
|      | <i>Rhodococcus</i> sp. FXJ8.139 16S rRNA gene, partial sequence                     | 99  |
| MA17 | <i>Rhodococcus</i> sp. 7B-577 16S rRNA gene, partial sequence                       | 99  |
|      | <i>Rhodococcus</i> sp. K4-07B 16S rRNA gene, partial sequence                       | 99  |
|      | <i>Kocuria palustris</i> strain MU14/1, complete genome                             | 100 |
| MA18 | <i>Kocuria palustris</i> strain IHBB 11063 16S rRNA gene, partial sequence          | 100 |
|      | <i>Kocuria palustris</i> strain 3538 16S rRNA gene, partial sequence                | 100 |
|      | <i>Rhodococcus boritolerans</i> gene for 16S rRNA, partial sequence, strain: BTM-1c | 99  |
| MA19 | Uncultured bacterium clone Md-129 16S rRNA gene, partial sequence                   | 99  |
|      | Uncultured bacterium clone Md-125 16S rRNA gene, partial sequence                   | 99  |
|      | <i>Aeromicrobium</i> sp. 1/4_C7/16_31 16S rRNA gene, partial sequence               | 99  |
| MA20 | <i>Aeromicrobium</i> alkaliterrae strain KSL-107 16S rRNA gene, partial sequence    | 99  |
|      | <i>Aeromicrobium</i> sp. VO40-3 16S rRNA gene, partial sequence                     | 99  |
|      | Uncultured bacterium clone EDW07B001_137 16S rRNA gene, partial sequence            | 99  |
| MA21 | Uncultured bacterium clone EDW07B001_114 16S rRNA gene, partial sequence            | 99  |
|      | Uncultured bacterium clone EDW07B001_58 16S rRNA gene, partial sequence             | 99  |

|      |                                                                                                                                                                                                                          |     |
|------|--------------------------------------------------------------------------------------------------------------------------------------------------------------------------------------------------------------------------|-----|
|      | <i>Alternaria alternata</i> strain 16/10 18S rRNA gene, partial sequence; internal transcribed spacer 1, 5.8S rRNA gene, and internal transcribed spacer 2, complete sequence; and 28S rRNA gene, partial sequence       | 94  |
| MA22 | <i>Ulocladium chartarum</i> strain E-000535862 18S rRNA gene, partial sequence; internal transcribed spacer 1, 5.8S rRNA gene, and internal transcribed spacer 2, complete sequence; and 28S rRNA gene, partial sequence | 99  |
|      | <i>Ulocladium</i> sp. 10a2-1-s 18S rRNA gene, partial sequence; internal transcribed spacer 1, 5.8S rRNA gene, and internal transcribed spacer 2, complete sequence; and 28S rRNA gene, partial sequence                 | 99  |
|      | <i>Bacillus</i> sp. A-3-8 16S rRNA gene, partial sequence                                                                                                                                                                | 100 |
| YPD1 | <i>Bacillus</i> sp. A-3-7B 16S rRNA gene, partial sequence                                                                                                                                                               | 100 |
|      | <i>Bacillus</i> sp. A-2-17 16S rRNA gene, partial sequence                                                                                                                                                               | 100 |
|      | <i>Verticillium dahliae</i> strain F724 18S rRNA gene, partial sequence; internal transcribed spacer 1, 5.8S rRNA gene, and internal transcribed spacer 2, complete sequence; and 28S rRNA gene, partial sequence        | 100 |
| YPD2 | Uncultured <i>Verticillium</i> clone Repts_1522 18S rRNA gene, internal transcribed spacer 1, 5.8S rRNA gene, internal transcribed spacer 2, and 28S rRNA gene, complete sequence                                        | 99  |
|      | <i>Gibellulopsis nigrescens</i> strain M331 18S rRNA gene, partial seequence; internal transcribed spacer 1, 5.8S rRNA gene, and internal transcribed spacer 2, complete sequence; and 28S rRNA gene, partial sequence   | 99  |
|      | <i>Pantoea agglomerans</i> strain NSF 16S rRNA gene, partial sequence                                                                                                                                                    | 100 |
| YPD3 | <i>Curtobacterium plantarum</i> strain S4 16S rRNA gene, partial sequence                                                                                                                                                | 100 |
|      | <i>Curtobacterium plantarum</i> strain S2 16S rRNA gene, partial sequence                                                                                                                                                | 100 |
|      | <i>Curtobacterium oceanosedimentum</i> partial 16S rRNA gene, strain L24                                                                                                                                                 | 100 |
| YPD4 | <i>Curtobacterium oceanosedimentum</i> strain JN24 16S rRNA gene, partial sequence                                                                                                                                       | 100 |
|      | <i>Bacillus subtilis</i> strain TPL16 16S rRNA gene, partial sequence                                                                                                                                                    | 100 |
| YPD5 | Uncultured bacterium clone f4h7 16S rRNA gene, partial sequence                                                                                                                                                          | 99  |

|       |                                                                                              |     |
|-------|----------------------------------------------------------------------------------------------|-----|
|       | Uncultured bacterium clone s2h10a 16S rRNA gene, partial sequence                            | 99  |
|       | <i>Serratia marcescens</i> isolate CECRIbio 01 16S rRNA gene, complete sequence              | 99  |
|       | <i>Bacillus</i> sp. A-3-15 16S rRNA gene, partial sequence                                   | 100 |
| YPD6  | <i>Bacillus subtilis</i> strain H-3 16S rRNA gene, partial sequence                          | 100 |
|       | <i>Bacillus megaterium</i> strain Q3, complete genome                                        | 100 |
|       | <i>Curtobacterium</i> sp. W2.10-183 16S rRNA gene, complete sequence                         | 100 |
| YPD7  | <i>Curtobacterium</i> sp. D-17 16S rRNA gene, partial sequence                               | 100 |
|       | <i>Curtobacterium</i> sp. SAp758.3 16S rRNA gene, partial sequence                           | 100 |
|       | <i>Rathayibacter caricis</i> strain VKM Ac-1799 16S rRNA gene, partial sequence              | 99  |
| YPD8  | <i>Rathayibacter tritici</i> strain IHBB 9484 16S rRNA gene, partial sequence                | 99  |
|       | <i>Rathayibacter tritici</i> strain DSM 7486 16S rRNA gene, partial sequence                 | 99  |
|       | Bacterium RSB-1 gene for 16S rRNA, partial sequence                                          | 99  |
| YPD9  | Uncultured bacterium clone 286 16S rRNA gene, partial sequence                               | 99  |
|       | Uncultured bacterium clone 411 16S rRNA gene, partial sequence                               | 99  |
|       | <i>Pantoea agglomerans</i> strain WSB 16S rRNA gene, partial sequence                        | 100 |
| YPD10 | <i>Pantoea agglomerans</i> strain SSF 16S rRNA gene, partial sequence                        | 100 |
|       | <i>Pantoea agglomerans</i> strain QSA 16S rRNA gene, partial sequence                        | 100 |
|       | <i>Microbacterium testaceum</i> strain V12 16S rRNA gene, partial sequence                   | 99  |
|       | <i>Microbacterium testaceum</i> StLB037 DNA, complete genome                                 | 99  |
| YPD11 | <i>Microbacterium testaceum</i> StLB037 strain StLB037 16S rRNA, complete sequence           | 99  |
|       | <i>Lactococcus lactis</i> subsp. Cremoris gene for 16S rRNA, partial sequence, strain: Ni793 | 99  |
| YPD12 | <i>Lactobacillus curvatus</i> gene for 16S rRNA, partial sequence, strain: JCM 1096          | 99  |
|       | Uncultured bacterium clone MY 40 16S rRNA gene, partial sequence                             | 99  |
|       | <i>Microbacterium testaceum</i> partial 16S rRNA gene, strain YJM-08                         | 99  |
| YPD13 | <i>Microbacterium</i> sp. Acj 118 gene for 16S rRNA, partial sequence                        | 99  |
|       | <i>Microbacterium testaceum</i> strain LM-2 16S rRNA gene, partial sequence                  | 99  |

|       |                                                                               |     |
|-------|-------------------------------------------------------------------------------|-----|
|       | <i>Bacillus siamensis</i> strain IHB B 15652 16S rRNA gene, partial sequence  | 99  |
| YPD14 | <i>Bacillus amyloliquefaciens</i> strain SWM1 16S rRNA gene, partial sequence | 99  |
|       | <i>Bacillus siamensis</i> strain IHB B 14741 16S rRNA gene, partial sequence  | 99  |
|       | <i>Bacillus methylotrophicus</i> strain YJ11-1-4, complete genome             | 100 |
| YPD15 | <i>Bacillus amyloliquefaciens</i> strain L-S60, complete genome               | 100 |
|       | <i>Bacillus amyloliquefaciens</i> strain L-H15, complete genome               | 100 |

---

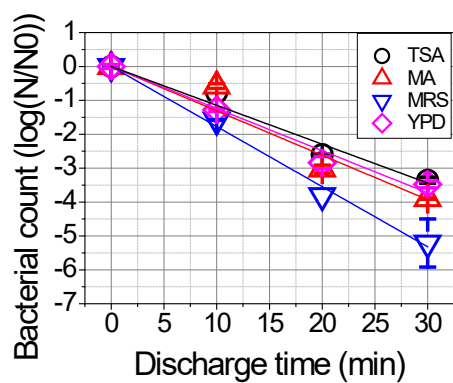

(a)

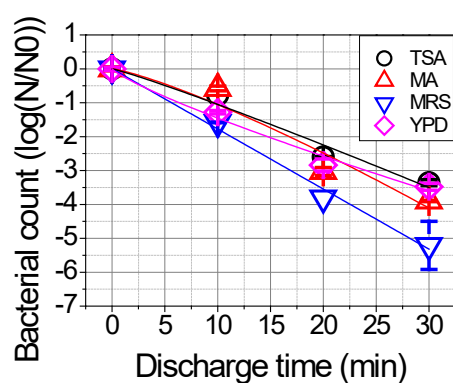

(b)

**Figure S1.** The Log-linear and Weibull model fitted to the inactivation rate of microorganisms cultured by 4 different agars. (a) the Log-linear model, and (b) the Weibull model
